# Supplementary material for: A high glucose diet induces autophagy in a HLH-30/TFEB-dependent manner and impairs the normal lifespan of C. elegans
Source: publisher site journal article supplement (doi:10.18632/aging.101577), 2018-10-05
Supplement: Supplementary file [file aging-v10i10-101577-supplementary-material-SD1.pdf]

## SUPPLEMENTARY FIGURES

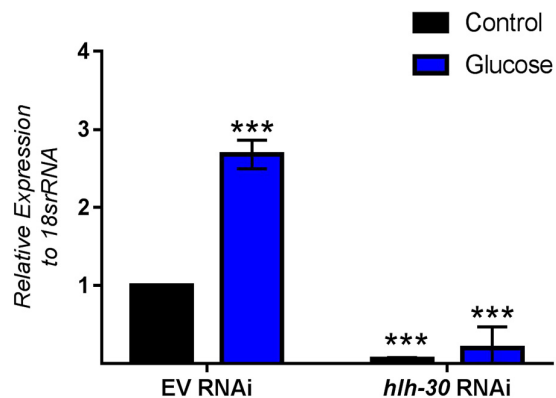

**Supplementary Figure 1. mRNA expression of *hlh-30*.** qRT-PCR analysis of *hlh-30* expression after treatment with the control (empty vector) or *hlh-30* RNAi. The bars indicate the mean  $\pm$  SEM relative to nematodes fed with control RNAi from three biological replicates. p-values (\* $p < 0.05$  and \*\* $p < 0.01$ ) were determined by one-way ANOVA with Bonferroni's post hoc test using GraphPad Prism.

**A**

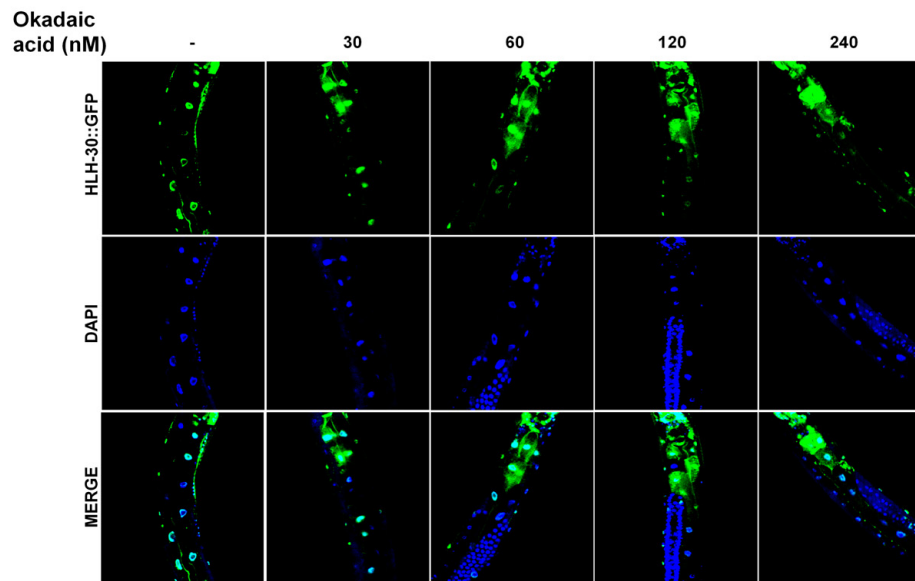

**B**

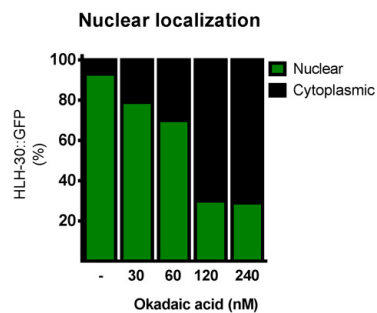

**Supplementary Figure 2. Dose response assay of nuclear localization of HLH-30::GFP.** Okadaic acid decreased HLH-30 nuclear localization in a concentration-dependent manner. (A) Representative fluorescence images showing HLH-30::GFP in worms fed a high glucose diet and different okadaic acid concentrations (30, 60, 120 and 240 nM) for 24 h. Quantification is given in (B). Nuclei were labeled with DAPI (blue dots).
